# Supplementary material for: Probiotic plant-based yogurts from common beans (phaseolus vulgaris): physicochemical properties, bioactive peptides, and health-promoting activities before and after in vitro digestion
Source: Research Square preprint supplement (doi:10.21203/rs.3.rs-8339775/v1), 2025-12-22
Supplement: Supplementary file 1 [file 0086424876b8d31deb270ee9.docx]

Supplementary Table S1**.** Concentration and composition of chemicals in stock solutions of simulated salivary fluid (SSF), simulated gastric fluid (SGF), and simulated intestinal fluid (SIF).

| Salts | SSF (pH 7) | SGF (pH 3) | SIF (pH 7) |
| --- | --- | --- | --- |
| Final concentration  (mM) in SSF | Final concentration  (mM) in SGF | Final concentration  (mM) in SIF |
| KCl | 15.10 | 6.90 | 6.80 |
| NaCl | - | 47.20 | 38.40 |
| HCl | 1.10 | 15.60 | 8.40 |
| NaHCO3 | 13.60 | 25.00 | 85.00 |
| KH2PO4 | 3.70 | 0.90 | 0.80 |
| MgCl2(H2O)6 | 0.15 | 0.12 | 0.33 |
| (NH4)2CO3 | 0.06 | 0.50 | - |
| CaCl2(H2O)2 | 1.50 | 0.15 | 0.60 |

Supplementary Table S2. Identified dipeptides and tripeptides in bean milks and yogurts following *in vitro* gastrointestinal simulation, along with their relative intensities.

|  | Digested bean milks | | | | | Digested bean yogurts | | | | |
| --- | --- | --- | --- | --- | --- | --- | --- | --- | --- | --- |
| Amino Acid Sequence | Soy | Navy | Great Northern | Pinto | Red Kidney | Soy | Navy | Great Northern | Pinto | Red Kidney |
| .alpha.-L-Asp-L-Lys | 721618 | 682635 | 681570 | 727869.5 | 740818.2 | 808877.2 | 777461.5 | 651909.8 | 668848.5 | 746810.7 |
| .gamma.-L-Glu-.epsilon.-L-Lys | 92708.3 | 94528.4 | 117822 | 124843.4 | 113889.4 | 99309.88 | 114150.8 | 118405.8 | 127122.8 | 117450.5 |
| Ala-Gln | 1155115 | 433537 | 468992 | 413614.4 | 453422.6 | 1098478 | 395320.2 | 409122.6 | 422394.5 | 442777.5 |
| Ala-Glu | 376231 | 329395 | 404544 | 363610 | 348989.4 | 340581.9 | 279556.3 | 297193.3 | 308341.9 | 302609.9 |
| Ala-Lys | 1072634 | 5034860 | 4724705 | 4631103 | 5052666 | 1258200 | 4156930 | 4281424 | 4088404 | 4503871 |
| Ala-Ser | 608099 | 669011 | 639406 | 625933.2 | 612839.3 | 534630 | 571065 | 529934.4 | 585236.1 | 588183.7 |
| Arg-Asp | 2895.96 | 13648 | 9384.37 | 13262.53 | 10550.62 | 2411.005 | 5459.263 | 5480.964 | 8634.217 | 6233.041 |
| Arg-Glu | 1700890 | 1737940 | 1764023 | 1727828 | 1828656 | 1981062 | 2067734 | 1935624 | 1942926 | 1917585 |
| Arg-Lys | 463164 | 383445 | 432885 | 356375.8 | 328413.7 | 394138.8 | 297275.6 | 366586.9 | 296483.1 | 315543 |
| Arg-Tyr | 538647 | 256478 | 257559 | 247195.5 | 250500.2 | 378915.7 | 247801.7 | 267231.1 | 282676.3 | 280080.8 |
| Asn-Asn | 422992 | 172482 | 167603 | 168018 | 205938.3 | 480804.3 | 215775.5 | 157190.8 | 168925.3 | 203747.7 |
| Asn-Glu | 341910 | 378880 | 376081 | 387461 | 402482.8 | 286688.6 | 350106.7 | 301841.4 | 358109.7 | 341882.2 |
| Asn-Phe | 372818 | 101532 | 69337.7 | 65381.96 | 79037.78 | 411709.5 | 93920.72 | 101212.8 | 82548.91 | 110538.8 |
| Asn-Val | 415496 | 726591 | 691904 | 714469.4 | 776218.3 | 323504.6 | 579709.3 | 573740.8 | 640249.9 | 688735.8 |
| Asp-Thr | 313490 | 360969 | 201571 | 250146.8 | 296017.1 | 332635.6 | 227216.1 | 184862 | 211769.1 | 250039.4 |
| Asp-Tyr | 99819.4 | 158147 | 122889 | 141863.7 | 143070.2 | 104075.2 | 132353.3 | 121026.7 | 139235.8 | 126173.1 |
| gamma-L-Glu-L-Tyr | 1633786 | 79580.5 | 73260.9 | 90640.63 | 88261.19 | 1345886 | 53480.11 | 54971.58 | 67212.33 | 63251.49 |
| Gln-Asn | 745605 | 676963 | 613043 | 652945.7 | 744610.9 | 859394.6 | 632840.6 | 579180.6 | 614167.5 | 679931.5 |
| Glu-Gln | 1308112 | 875524 | 713946 | 774475 | 985970.8 | 1263421 | 584241.4 | 575704 | 743034.7 | 853387.1 |
| Glu-Glu | 721097 | 435638 | 436375 | 395188.4 | 448892.8 | 544388.5 | 347164.1 | 337925.4 | 344126.6 | 390659 |
| Glu-His | 19276.9 | 62238.4 | 59501.9 | 69463.79 | 76760.15 | 26236.17 | 80133.5 | 78391.66 | 85728.31 | 74541.32 |
| Glu-Lys | 243404 | 296465 | 488633 | 376016 | 301390 | 143475.3 | 199563.2 | 291534.6 | 335714.6 | 271951.9 |
| Glu-Met | 368123 | 256566 | 391505 | 312928.9 | 273120.7 | 400305.5 | 396816.1 | 465642.2 | 316086.4 | 311236.9 |
| Glu-Phe | 761067 | 42496.5 | 54168.5 | 56549.94 | 51779.71 | 674103.3 | 42788.94 | 50109.31 | 49859.92 | 48704.25 |
| Glu-Ser | 174603 | 147748 | 241246 | 227506.6 | 206490.1 | 144182.8 | 137787.4 | 159840.7 | 129243.7 | 147002 |
| Gly-Asp | 14597 | 16640.1 | 19182.9 | 21121.1 | 24968.72 | 16085.93 | 22191.43 | 19532.46 | 22626.37 | 21026.32 |
| Gly-Gln | 104943 | 359358 | 146928 | 244917 | 288304.7 | 127198.1 | 314609.6 | 160105.1 | 248360.3 | 270035 |
| Gly-Glu | 54525.7 | 39606.6 | 46159.1 | 47151.42 | 45675.59 | 68000.32 | 56316.23 | 56632.71 | 47480.88 | 44905.2 |
| Gly-His | 280029 | 449373 | 519384 | 559968.5 | 497057.2 | 365254.6 | 549825 | 523922.5 | 506649.9 | 528181.3 |
| Gly-Phe | 669996 | 627703 | 532514 | 549724.7 | 555896.8 | 690916.6 | 603273.8 | 547456.6 | 603182.6 | 593928.1 |
| Gly-Pro | 17127.7 | 31105.2 | 29721.1 | 28752.16 | 32576.89 | 27523.23 | 44708.19 | 41367.67 | 40975.38 | 46902.26 |
| His-Ala | 2686624 | 3478713 | 4143350 | 4061035 | 4521614 | 3069174 | 4239415 | 4405393 | 4132204 | 4762446 |
| His-Asn | 734709 | 695798 | 798387 | 842668.5 | 804924.8 | 792817.3 | 971032.2 | 882095.5 | 888049.6 | 864072.6 |
| His-Asp | 0 | 89667.7 | 90042.3 | 69822.27 | 32679.95 | 0 | 44027.42 | 76152.67 | 62488.24 | 25811.64 |
| His-Gln | 4277523 | 661260 | 834304 | 716469.9 | 790836.7 | 4334333 | 856023.3 | 872124 | 836437.2 | 872405.2 |
| His-His | 65047.1 | 320579 | 433054 | 437404.6 | 374963.6 | 56742.62 | 287017.3 | 291527.8 | 246661.2 | 353766 |
| His-Leu | 1366082 | 2917244 | 1990287 | 1974903 | 2317091 | 1200044 | 1787007 | 1809053 | 2036918 | 2300498 |
| His-Met | 538806 | 687707 | 626798 | 604569.3 | 581371.5 | 472219.1 | 552528.6 | 476466 | 545782.1 | 487836.6 |
| His-Phe | 674903 | 355719 | 283908 | 271141.7 | 349922.3 | 548243.2 | 268985.7 | 235736.3 | 255749.3 | 330003.7 |
| His-Pro | 103331 | 517664 | 653540 | 662892.1 | 708602.7 | 152558 | 644534.2 | 628554.7 | 685704.1 | 699394.9 |
| His-Tyr | 268102 | 221065 | 163411 | 147968.2 | 135898 | 276874.7 | 137789.3 | 163805.8 | 155730.8 | 175705.2 |
| His-Val | 1674972 | 1789345 | 2216804 | 1919961 | 1800493 | 1384929 | 1647308 | 1720221 | 1642538 | 1606079 |
| Ile-Pro | 1055362 | 2837536 | 2807449 | 2812216 | 3129546 | 1301663 | 2576828 | 2352395 | 2199482 | 2639036 |
| L-.gamma.-Glutamyl-L-glutamic Acid | 164182 | 151155 | 168203 | 162997.9 | 160578.6 | 195733.7 | 189177.6 | 174747.7 | 165013.1 | 166548.4 |
| L-.gamma.-Glutamyl-L-glutamine | 289715 | 516966 | 598918 | 642473.4 | 654144.4 | 256137.1 | 468692 | 468997.1 | 592908 | 513558 |
| Leu-Glu | 194766 | 746080 | 1552246 | 1549672 | 786840.3 | 156026.5 | 669672.8 | 1506123 | 1435701 | 828124.4 |
| Leu-His | 680264 | 1951846 | 2213903 | 2330277 | 2487519 | 687857.3 | 2258119 | 2199051 | 2264526 | 2485917 |
| Leu-Ile | 1.4E+07 | 1.1E+07 | 9820391 | 12453755 | 14339437 | 13590862 | 10106394 | 10743250 | 12391956 | 12907290 |
| Leu-Ser | 1404507 | 996342 | 1489908 | 1245134 | 1262931 | 1618379 | 1606132 | 1697914 | 1445984 | 1689458 |
| Leu-Trp | 2014970 | 850361 | 661308 | 782793.2 | 573926.4 | 2311911 | 716263.6 | 779215.7 | 857800.4 | 931664.5 |
| Leu-Tyr | 5604774 | 2321070 | 2057338 | 2114748 | 2174817 | 5492459 | 1955359 | 2353326 | 2280798 | 2505852 |
| Leu-Val | 6.7E+07 | 4E+07 | 4.2E+07 | 46890077 | 38835394 | 66207696 | 41461038 | 43338185 | 44400511 | 52824931 |
| Lys-Asn | 265516 | 250484 | 312798 | 306681.7 | 290610.8 | 243001 | 278876.8 | 280309.7 | 262904 | 275753.3 |
| Lys-Lys | 455255 | 311246 | 408944 | 337903.3 | 327584.6 | 338049.1 | 250288.4 | 286482.1 | 237989.4 | 269385.5 |
| Lys-Met | 326523 | 149750 | 166128 | 119584.9 | 105585.1 | 276634.2 | 98621.32 | 155537.3 | 128084.2 | 119740.4 |
| Lys-Pro | 249981 | 681230 | 565424 | 605949 | 584545.3 | 282973.2 | 618771.4 | 569814.4 | 542475.7 | 537614.3 |
| Met-Asp | 91954.2 | 91317.7 | 105176 | 102581.2 | 97512.51 | 97768.79 | 97819.94 | 90076.46 | 100098.2 | 93680.83 |
| Met-Met | 63379.1 | 19894.4 | 20426.5 | 18078.94 | 18627.69 | 62087.27 | 17314.57 | 22562.34 | 19570.92 | 20352.39 |
| Met-Tyr | 178415 | 35217 | 39566.7 | 29895.41 | 25516.95 | 169034.7 | 30111.94 | 40781.36 | 34327.55 | 32325.5 |
| Met-Val | 2154677 | 2709738 | 3464705 | 2584735 | 2773252 | 2122348 | 2210370 | 3109310 | 2535665 | 3146525 |
| Phe-Asn | 281924 | 193449 | 199236 | 184983.4 | 182842.8 | 218548.7 | 150077.2 | 152658 | 166269.2 | 170906.7 |
| Phe-Asp | 658659 | 715256 | 1084820 | 919183 | 679192.2 | 780878.4 | 1077982 | 1282998 | 982205.1 | 840433.2 |
| Phe-Gln | 318208 | 199053 | 87381.6 | 117392.1 | 132699 | 266649 | 105136.1 | 67957.93 | 97291.66 | 113846.2 |
| Phe-Glu | 821430 | 691427 | 751573 | 739929.3 | 1071101 | 751811 | 704662.7 | 656229.3 | 654381.9 | 1040889 |
| Phe-His | 158028 | 91388.4 | 108267 | 82629.06 | 96196.08 | 129323.6 | 98970.09 | 81847.98 | 87419.53 | 88076.92 |
| Phe-Lys | 180267 | 153483 | 122219 | 96128.69 | 100416.1 | 159279.6 | 67003.38 | 92737.54 | 85567.06 | 95093.36 |
| Phe-Met | 303214 | 90934.3 | 83942.6 | 76554.85 | 86485.07 | 277019.5 | 68233 | 102892.3 | 88931.6 | 105689 |
| Phe-Phe | 68863.3 | 24420.8 | 23188.9 | 21841.22 | 16448.58 | 59054.24 | 17504.57 | 29474.53 | 24328.62 | 36752.29 |
| Phe-Thr | 338867 | 149058 | 180406 | 159226.6 | 159601.9 | 324365.6 | 155611.7 | 168938 | 158158.6 | 174545.6 |
| Phe-Trp | 71174.5 | 25067.6 | 12591 | 14344.39 | 11988.02 | 78270.12 | 14788.07 | 19903.64 | 22229.94 | 24383.47 |
| Phe-Val | 6014012 | 3140222 | 3008952 | 3265518 | 2335527 | 5897122 | 2547057 | 3098202 | 3179381 | 3598435 |
| Pro-Arg | 777880 | 524937 | 454828 | 477795.3 | 479111.4 | 853656.2 | 536049.5 | 462045.2 | 462408.9 | 469432.6 |
| Pro-Gln | 97414.8 | 76645.4 | 84957.6 | 86065.39 | 87161.52 | 128229.4 | 99003.77 | 106771.2 | 93032.06 | 97632.52 |
| Pro-Glu | 97356.7 | 246629 | 118090 | 195153.5 | 225682.2 | 143452.2 | 243552.7 | 156499.6 | 272109.8 | 295281.5 |
| Pro-His | 307870 | 252619 | 257051 | 251014.3 | 250288.6 | 450272.8 | 381112.6 | 339080.1 | 318122.4 | 334141.3 |
| Pro-Ile | 2567.4 | 45300.3 | 27849.3 | 31535.34 | 46979.99 | 5869.597 | 59749.95 | 31538.87 | 36313.3 | 54230.79 |
| Pro-Leu | 1998643 | 1815169 | 1931221 | 1903766 | 2419286 | 2099239 | 1928301 | 1930633 | 2314761 | 2531782 |
| Pro-Met | 30019.7 | 51404.7 | 52058.8 | 43986.33 | 40253.05 | 40756.47 | 52979.51 | 54369.61 | 44996.05 | 45064.68 |
| Pro-Trp | 123271 | 278047 | 270633 | 334210.9 | 302831.7 | 317624.2 | 406123.1 | 404388.7 | 474495.4 | 448288.9 |
| PyroGlu-Ala | 40561.8 | 13216.2 | 18918.4 | 15583.56 | 14126.87 | 48918.34 | 16157.43 | 20141.24 | 18197.26 | 17091.35 |
| PyroGlu-Met | 48625.1 | 107339 | 157408 | 132811.3 | 117206 | 51532.92 | 159653.6 | 191434.1 | 129221.6 | 122108.9 |
| PyroGlu-Phe | 76311.6 | 14118.6 | 12930.1 | 12218.11 | 14124.38 | 76604.55 | 14239.77 | 11854.83 | 12810 | 13041.96 |
| PyroGlu-Tyr | 45925.3 | 49842.4 | 53249.7 | 50184.21 | 43092.59 | 63181.86 | 58473.82 | 65126.62 | 62298.78 | 59871.42 |
| Ser-Asp | 80533 | 185835 | 128966 | 151156.2 | 145925.8 | 78368.72 | 152381.7 | 117421.3 | 124669.9 | 113382.7 |
| Ser-Gln | 1181167 | 1065249 | 800309 | 952615.3 | 1142309 | 1285821 | 638176.5 | 668943.8 | 770732.6 | 768915.7 |
| Ser-Glu | 1943888 | 1159292 | 1298259 | 1273154 | 1261793 | 1316712 | 1070612 | 992212.8 | 1175255 | 1203498 |
| Ser-Thr | 516599 | 1195339 | 1092499 | 1267315 | 1165894 | 422627.6 | 892255.6 | 732436.9 | 1251868 | 1078008 |
| Ser-Val | 786900 | 628752 | 432571 | 520295.3 | 571491.3 | 966421.9 | 510497.8 | 451427.7 | 513149.5 | 546710.5 |
| Thr-Arg | 588913 | 741344 | 767312 | 730039.1 | 717695.3 | 632738.2 | 809410.6 | 885067.4 | 843948 | 798180.1 |
| Thr-Gln | 331175 | 517665 | 429112 | 515813 | 473324.9 | 344277.8 | 422573.2 | 376889 | 492949 | 448844.4 |
| Thr-Glu | 543002 | 876978 | 963637 | 944349.5 | 976252.3 | 428786.7 | 770117.1 | 780806.9 | 846319.4 | 906890.3 |
| Thr-His | 382230 | 379817 | 303400 | 354787 | 440666.5 | 357545.4 | 320155.8 | 313490 | 327851.3 | 405830 |
| Thr-Leu | 2778182 | 1327287 | 1178916 | 1287311 | 1292861 | 2873788 | 1213110 | 1304987 | 1341251 | 1362257 |
| Thr-Phe | 287492 | 284847 | 122591 | 145531.7 | 162751.9 | 260786.8 | 156477.7 | 138864.7 | 142928.8 | 191470.2 |
| Thr-Thr | 176617 | 148153 | 120744 | 128771.7 | 181771.6 | 151809 | 120688.9 | 112356.1 | 134098.8 | 180131.9 |
| Thr-Tyr | 79670.2 | 85803.4 | 37239.5 | 54532.66 | 53103.55 | 91634.67 | 46280.73 | 40716.74 | 48840.39 | 51578.83 |
| Trp-Gln | 128078 | 39894.5 | 33737.5 | 30475.41 | 27538.24 | 95187.61 | 27135.68 | 29550.55 | 31569.13 | 29218.29 |
| Trp-Glu | 951754 | 555712 | 581345 | 620336 | 594391.8 | 960290.7 | 528528.1 | 485313.4 | 626927.6 | 521125.4 |
| Trp-Met | 839677 | 129714 | 110398 | 99167.51 | 95241.07 | 875330.4 | 110784.6 | 144008.7 | 113163.7 | 148178 |
| Tyr-Asn | 249784 | 2350.89 | 10947.6 | 1384.691 | 1536.983 | 227838.8 | 10723.97 | 3044 | 1943.05 | 1348.358 |
| Tyr-Gln | 108045 | 35621.6 | 28189.2 | 30404.9 | 29498.89 | 89560.99 | 29282 | 29878.69 | 30668.96 | 34083.48 |
| Tyr-Glu | 337173 | 392769 | 436203 | 423613 | 373762.9 | 268467.1 | 331845.9 | 371239.3 | 372733.8 | 361221.5 |
| Tyr-Gly | 208218 | 217003 | 173631 | 188170 | 160628.3 | 216964.5 | 153057 | 153560.3 | 166303.8 | 138098.3 |
| Tyr-His | 98349.5 | 204285 | 189604 | 174902.3 | 153926.3 | 121179.1 | 193699.6 | 202322 | 177982.8 | 164922.1 |
| Tyr-Lys | 467327 | 341437 | 224338 | 253486.7 | 235463.5 | 417462.9 | 200834.6 | 173391 | 249974.9 | 222530 |
| Tyr-Met | 43208.8 | 13536.9 | 14326.4 | 11055.36 | 9490.347 | 27138.39 | 7921.792 | 9532.832 | 10210.89 | 7656.998 |
| Tyr-Phe | 94354.3 | 97406.9 | 77188.6 | 77743.51 | 85513.18 | 96990.21 | 78891.18 | 96802.06 | 94843.55 | 123579.6 |
| Val-Asn | 117480 | 183348 | 178364 | 185059.4 | 175872.7 | 118472 | 160101.4 | 144377.5 | 159456 | 164126 |
| Val-Glu | 2552160 | 2476749 | 3179900 | 2851486 | 3023815 | 3126568 | 3369079 | 3396066 | 3112225 | 3475631 |
| Val-His | 1594263 | 1928753 | 2205241 | 1961875 | 2087020 | 1689039 | 1984136 | 2144200 | 1904862 | 1968548 |
| Val-Ser | 338718 | 89522.7 | 85456.7 | 96679.4 | 90905.43 | 294603.9 | 92844.16 | 83937.53 | 90582.15 | 85955.25 |
| Val-Trp | 934645 | 1071056 | 462492 | 742135.3 | 856215.3 | 907667.1 | 887477.2 | 533706.2 | 824982 | 1053077 |
| Ala-Ala-Lys | 40592.8 | 102283 | 84327 | 75442.11 | 78726.1 | 45865.8 | 89980.64 | 94753.6 | 78535.03 | 85241.7 |
| Ala-Asn-Lys | 72608.8 | 36530.3 | 43616.9 | 33652.57 | 40140.22 | 69569.36 | 32997 | 39946.29 | 32244.55 | 36210.03 |
| Ala-Glu-Lys | 167528 | 92867.4 | 86256.7 | 97317.83 | 118196.3 | 164592.8 | 48979.8 | 45396.56 | 50352.01 | 62391.6 |
| Ala-Gly-Arg | 689439 | 496975 | 334247 | 389062 | 409226.8 | 763421.2 | 383389.3 | 376997.8 | 395602 | 521868.9 |
| Ala-Val-Lys | 30313.1 | 71049.1 | 67380.8 | 69072.53 | 63527.99 | 34544.15 | 60817.4 | 52390.36 | 52211.76 | 42445.08 |
| Ala-Pro-Arg | 358403 | 399425 | 378973 | 351841.3 | 367360 | 328316.4 | 327953 | 314775.9 | 324295.1 | 306218.9 |
| Ala-Pro-Lys | 313046 | 497346 | 466400 | 439169.8 | 440358.3 | 274729.5 | 431049 | 392711.9 | 390788.4 | 380315.4 |
| Asn-Ala-Lys | 92359.8 | 18064.8 | 25625.5 | 13741.63 | 16843.58 | 111518 | 19864.51 | 25044.07 | 18407.77 | 22049.14 |
| Asn-Asp-Lys | 87935.6 | 147719 | 75511.3 | 126275.1 | 231004.7 | 77687.61 | 139153.3 | 64847.59 | 101614.6 | 201696.9 |
| Asn-Gly-Lys | 14537.2 | 16028.1 | 64215.7 | 64656.52 | 12695.5 | 12026.45 | 14823.52 | 62167.67 | 70231.42 | 11916.79 |
| Asn-Leu-Lys | 280115 | 43972.6 | 39874.1 | 32302.8 | 40295.64 | 236349.4 | 32569.46 | 37077.81 | 31909.01 | 37530.35 |
| Asn-Thr-Lys | 463908 | 15719.8 | 12662.9 | 11553.15 | 14745.1 | 409245.9 | 19131.6 | 26754.21 | 19426.82 | 18704.65 |
| Asp-Asn-Lys | 19475.5 | 59084.4 | 98612.5 | 76328.55 | 79168.96 | 13658.97 | 49068.91 | 72487.05 | 56375.86 | 60000.23 |
| Asp-Asp-Lys | 85577.3 | 9662.4 | 16343.6 | 9822.939 | 739.3396 | 108030 | 14339.67 | 18195.43 | 11549.63 | 1426.522 |
| Asp-Gly-Arg | 135644 | 70989.4 | 71613.1 | 48557.9 | 41387.27 | 92341.48 | 49919.28 | 53034.21 | 35450.72 | 33736.01 |
| Asp-Gly-Lys | 40420.7 | 152669 | 207240 | 222297.3 | 250855.4 | 42976.48 | 191254 | 197679.8 | 188180.6 | 224369.8 |
| Asp-His-Lys | 40313.4 | 29988.8 | 30410.3 | 26529.82 | 15648.93 | 32231.31 | 29551.5 | 27562.51 | 23564.49 | 16021.32 |
| Asp-Ser-Lys | 3023.21 | 5163.29 | 7738.92 | 13268.73 | 14031.89 | 2542.934 | 4864.377 | 8269.82 | 7155.177 | 9897.083 |
| Asp-Val-Arg | 98921.1 | 72149.7 | 52025.6 | 48258.51 | 51315.37 | 84472.21 | 48089.75 | 51870.44 | 44639.7 | 46631 |
| Asp-Val-Lys | 495383 | 372775 | 310372 | 295408.1 | 337475.2 | 494589.6 | 349713.3 | 329531.5 | 275167 | 348498.9 |
| Gln-Asn-Lys | 197801 | 347345 | 362214 | 364450.7 | 458597.4 | 187254.1 | 357264.1 | 413634.7 | 350790.2 | 521787.9 |
| Gln-Asp-Lys | 73007.4 | 129163 | 105374 | 118340.8 | 141080.8 | 78416.19 | 146832.6 | 128727.1 | 135692.4 | 151507.4 |
| Gln-Glu-Arg | 66862.3 | 77077.2 | 70738.2 | 48711.24 | 57278.26 | 48964.54 | 95326.35 | 61105.53 | 51459.26 | 36500.05 |
| Gln-Glu-Lys | 469366 | 66722.5 | 68878.5 | 62754.13 | 63673.48 | 499895.1 | 69279.68 | 78351.83 | 71462.22 | 81780.99 |
| Gln-Leu-Lys | 1304981 | 471863 | 492479 | 499245.7 | 422514 | 1098541 | 486466.7 | 574134.3 | 548852.6 | 446293.2 |
| Glu-Ala-Lys | 70665.6 | 90633.1 | 90564.6 | 89188.72 | 96081.06 | 68490.74 | 106870.4 | 96396.89 | 89248.03 | 103758.2 |
| Glu-Asn-Lys | 204051 | 134780 | 196446 | 151596.9 | 158697.8 | 198006.5 | 167619.7 | 166841.1 | 174317 | 166155 |
| Glu-Asp-Lys | 120926 | 65547.1 | 63265.3 | 83009.91 | 78389.56 | 128956.2 | 73232.22 | 77125.64 | 61193.17 | 70208.54 |
| Glu-Gln-Lys | 200185 | 193520 | 373418 | 288299.6 | 176427.6 | 200141.3 | 172528.4 | 264004.8 | 223730.1 | 187552.5 |
| Glu-Gly-Lys | 11798.3 | 29687.6 | 50301.7 | 46076.68 | 39754.85 | 12588.36 | 31060.16 | 32699.67 | 34832.32 | 37917.58 |
| Glu-Lys-Lys | 7520.66 | 33489.3 | 30638 | 37769.65 | 31647.72 | 9384.879 | 35430.88 | 40650.59 | 42616.33 | 33293.99 |
| Glu-Pro-Arg | 809670 | 330255 | 297283 | 309293.7 | 286924.1 | 931766.9 | 337828.1 | 314826.1 | 284185.6 | 274087.7 |
| Gly-Ala-Arg | 774871 | 188695 | 166975 | 160876.3 | 148979 | 830269.5 | 183971 | 187062 | 182039.4 | 166580.4 |
| Gly-Ala-Lys | 405096 | 156936 | 154939 | 163057.5 | 134663.4 | 501413.9 | 172812 | 178399.2 | 154571 | 161425.7 |
| Gly-Asn-Lys | 120081 | 217211 | 282590 | 244213 | 251845.6 | 83458.05 | 226751.5 | 289919.6 | 249405 | 306012.8 |
| Gly-Gly-Arg | 125376 | 30432.3 | 51833.3 | 32413.1 | 32906.82 | 128187.1 | 26594.04 | 36181.74 | 33392.51 | 36223.51 |
| Gly-Gly-Gly-Gly-Gly-Gly | 25896 | 436900 | 532858 | 466310.7 | 526422.9 | 27184.12 | 410761.7 | 429322 | 425563.5 | 480077.2 |
| Gly-Gly-Lys | 476625 | 447544 | 434431 | 411491.9 | 477206.1 | 543557.2 | 478996.8 | 438693.2 | 431158.3 | 467852.9 |
| Gly-Pro-Arg | 521865 | 1159641 | 1133724 | 1007568 | 1110780 | 512161.1 | 1241922 | 1115224 | 1051561 | 1023699 |
| Gly-Pro-Lys | 307320 | 1373709 | 1385919 | 1646529 | 1708659 | 430861.2 | 1950704 | 1747802 | 1957919 | 2012837 |
| His-Asp-Lys | 152681 | 91021.9 | 95000.1 | 100425.6 | 103900 | 136575.7 | 95138.53 | 84682.19 | 77809.81 | 84817.08 |
| His-Pro-Lys | 2602.92 | 9515.82 | 9144.79 | 11229.35 | 11855.33 | 6101.247 | 10594.27 | 11873.22 | 9892.837 | 9769.301 |
| Ile-Ala-Lys | 168153 | 720164 | 477681 | 448300.6 | 513109.5 | 153476.3 | 366165.7 | 387399.1 | 414451.6 | 472819.2 |
| Ile-Gln-Arg | 506777 | 263242 | 207906 | 205300.1 | 260821 | 337199.1 | 179533.9 | 175843.5 | 180531 | 180880.5 |
| Ile-Val-Arg | 113048 | 6436.5 | 10977.8 | 6639.239 | 7218.162 | 95638.98 | 5603.638 | 6633.419 | 6705.314 | 8073.143 |
| Leu-Glu-Lys | 231599 | 151423 | 131410 | 114463.9 | 116257.1 | 211495.5 | 102146 | 133872.7 | 119635.5 | 129237 |
| Leu-Pro-Lys | 327304 | 179463 | 175264 | 148998.6 | 173735.3 | 320723.9 | 151332.5 | 145242.6 | 150370.1 | 152683.9 |
| Leu-Ser-Lys | 438192 | 1016401 | 406173 | 792990.8 | 733291.3 | 381135.5 | 1035182 | 403040.3 | 764624.9 | 740057.8 |
| Lys-Glu-Lys | 21657.3 | 44753.6 | 241153 | 199657 | 40101.02 | 15431.11 | 37878.26 | 214813.6 | 190056 | 37278.99 |
| Pro-Asn-Lys | 1286943 | 321101 | 353723 | 310212.2 | 314940.6 | 1371598 | 341994.6 | 307446.2 | 267066.5 | 255699.1 |
| Pro-Asp-Lys | 285000 | 75497.3 | 74863.1 | 89979.71 | 83474.29 | 231921.7 | 111494.5 | 95212.05 | 92757.46 | 87377.3 |
| Pro-Gly-Lys | 698780 | 369337 | 375104 | 394929.6 | 308277.2 | 785744.3 | 357600.3 | 351058.6 | 371268.9 | 274637 |
| Pro-His-Lys | 188521 | 93548 | 117724 | 111865 | 76881.1 | 168205.6 | 90044.1 | 93208.7 | 83509.96 | 76851.99 |
| Pro-Pro-Lys | 21034.8 | 52432.8 | 40366.6 | 40987.73 | 46324.46 | 35129.21 | 59201.79 | 43908.8 | 39098.51 | 45979.64 |
| Pro-Ser-Arg | 285170 | 777392 | 693767 | 781823.4 | 755030.2 | 283762.9 | 692527.7 | 617422.3 | 685349.6 | 631752.2 |
| Pro-Tyr-Lys | 61488.8 | 148545 | 149387 | 128264.9 | 106357.8 | 68053.75 | 157362 | 130550.2 | 137046.2 | 114237.2 |
| Pro-Val-Lys | 193951 | 68390.9 | 68238.1 | 60399.72 | 59085.25 | 172351.1 | 52381.15 | 47477.88 | 40319.3 | 48519.17 |
| Ser-Gly-Arg | 43511.4 | 41204.6 | 47794.3 | 33972.62 | 39243.68 | 49348.11 | 44222.27 | 35265.07 | 40926.09 | 41938.8 |
| Ser-Lys-Arg | 59316.3 | 7753.03 | 10355.8 | 6526.901 | 8805.358 | 33600.05 | 10325.96 | 8477.979 | 5916.756 | 6072.105 |
| Ser-Val-Arg | 51945.7 | 110976 | 93599.6 | 104076.7 | 142385.3 | 68504.25 | 180502.6 | 82583.07 | 122936 | 69360.27 |
| Thr-Ala-Lys | 10564.9 | 65427.4 | 48461.7 | 59287.48 | 80323.7 | 9786.13 | 87862.39 | 67173.39 | 73801.42 | 94408.98 |
| Thr-Asp-Lys | 305796 | 243208 | 329233 | 277610.3 | 323477.7 | 291976.7 | 234546.3 | 263160.8 | 219629 | 303341.3 |
| Thr-Pro-Lys | 468296 | 588827 | 541362 | 485989.6 | 465567.5 | 410296.2 | 449210.9 | 404579.2 | 365573 | 319638.4 |
| Tyr-Asp-Arg | 86028 | 41514.3 | 42053 | 47411.19 | 30165.83 | 105020.3 | 42396.47 | 51814.23 | 55418.75 | 29599.22 |
| Tyr-Gln-Lys | 204553 | 292128 | 174096 | 197661.7 | 243910.6 | 135579.3 | 152316.8 | 131094.5 | 133933.4 | 156484.4 |
| Val-Gly-Lys | 105798 | 88013.6 | 93583.8 | 88724.85 | 94970.38 | 110793.3 | 94641.31 | 94946.33 | 90851.54 | 88639 |

Supplementary Table S3. Dipeptides and tripeptides with potential antihypertensive functionality in bean milks and yogurts after *in vitro* gastrointestinal simulation.

| Amino acid sequence | Structural Constraints | Bioactivity | | Supporting Reference |
| --- | --- | --- | --- | --- |
| Asn-Asn; Glu-Glu; His-His; Lys-Lys; Met-Met; Phe-Phe; Thr-Thr; Pro-Pro-Lys; Ala-Ala-Lys; Asp-Asp-Lys; Glu-Lys-Lys; Gly-Gly-Arg; Gly-Gly-Lys; Gly-Gly-Gly-Gly | Presence of repeating amino acid peptides | ACE-inhibitory activity | | Siow and Gan (2013) |
| Gly-Pro; His-Pro; Ile-Pro; Lys-Pro; Arg-Tyr; Asp-Tyr; His-Tyr; Leu-Tyr; Met-Tyr; Thr-Tyr; Asn-Phe; Glu-Phe; Gly-Phe; His-Phe; Phe-Phe; Thr-Phe; Tyr-Phe  Leu-Trp; Phe-Trp; Pro-Trp; Val-Trp; Val-Asn; Val-Glu; Val-His; Val-Ser; Val-Trp; Arg-Asp; Arg-Glu; Arg-Lys; Arg-Tyr; Ile-Pro; Ile-Ala-Lys; Ile-Gln-Arg; Ile-Val-Arg; Val-Gly-Lys | Presence of Pro, Tyr, Phe, and Trp at the C-terminal extremity  Presence of Arg, Val, and Ile at N-terminal extremity | ACE-inhibitory activity | | Xue et al. (2021)  Cheung (1980) |
| Ala-Gln; Ala-Glu; Ala-Lys; Ala-Ser; His-Ala; Ala-Ala-Lys; Ala-Asn-Lys; Ala-Glu-Lys; Ala-Gly-Arg; Ala-Val-Lys; Ala-Pro-Arg; Ala-Pro-Lys; Asn-Ala-Lys; Glu-Ala-Lys; Gly-Ala-Arg; Gly-Ala-Lys; Ile-Ala-Lys; Thr-Ala-Lys  Leu-Glu; Leu-His; Leu-Ile; Leu-Ser; Leu-Trp; Leu-Tyr; Leu-Val; His-Leu; Pro-Leu; Thr-Leu; Leu-Glu-Lys; Leu-Pro-Lys; Leu-Ser-Lys; Asn-Leu-Lys; Gln-Leu-Lys | Presence of Ala and Leu | ACE-inhibitory activity | | Ciau-Solís et al. (2024) |
| Tyr-Gly; Arg-Tyr; Leu-Tyr | Presence of dipeptides with specific sequence | ACE-inhibitory activity | Pihlanto-Leppälä et al. (2000)  Matsufuji et al. (1994) | |

Semicolon is used to separate different peptides.


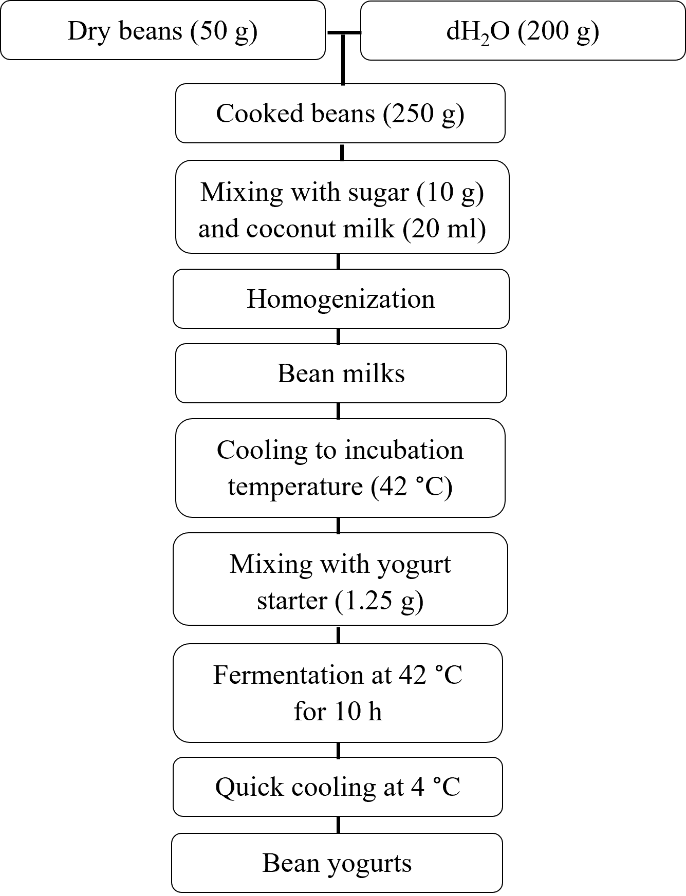


Supplementary Fig. S1. Flow chart of plant-based yogurt preparation from soy, navy, great northern, pinto, and red kidney beans.





Supplementary Fig. S2. The quantified overall of free amino acids, dipeptides, tripeptides, and their total intensity sum in digested bean milks and yogurts after *in vitro* gastrointestinal simulation.

SBM, soybean milk; SBY, soybean yogurt; NBM, navy bean milk; NBY, navy bean yogurt; GNBM, great northern bean milk; GNBY, great northern bean yogurt; PBM, pinto bean milk; PBY, pinto bean yogurt; RKBM, red kidney bean milk; RKBY, red kidney bean yogurt. Values with different superscripts within a sample differ significantly (p < 0.05).
